# Supplementary material for: Antimicrobial resistance profiles and molecular characterization of extended- spectrum β-lactamase/AmpC-harboring Klebsiella pneumoniae isolated from clinically ill dogs and cats in South Korea
Source: Research Square preprint supplement (doi:10.21203/rs.3.rs-7006419/v1), 2025-07-09
Supplement: Supplementary file 1 [file 59d8912717d55cedd1b84609.docx]

Table 3. Antimicrobial resistance pattern in *Klebsiella pneumoniae* isolatesobtained from diseased dogs (n = 130) during 2018–2021 in South Korea

| No. of antimicrobial | % (No. of resistant isolates) | Most common resistance pattern (No. of isolates) |
| --- | --- | --- |
| 0 | 54.6 (71) | – |
| 1 | 5.4 (7) | FOX (n = 3) |
| 2 | 5.4 (7) | DOX TET (n = 3) |
| 3 | 3.8 (5) | CFZ VEC FOX (n= 1) |
| CFZ VEC SXT (n = 1) |
| CHL DOX TET (n = 1) |
| DOX TET SXT (n = 1) |
| FOX TET SXT (n = 1) |
| 4 | 5.4 (7) | CHL DOX TET SXT (n = 4) |
| 5 | 4.6 (6) | FOX CHL DOX TET SXT (n = 2) |
| 6 | 1.5 (2) | AMC CFZ VEC DOX TET SXT (n = 1) |
| CFZ VEC FOX DOX ENO TET (n = 1) |
| 7 | 1.5 (2) | CFZ VEC CHL ENO MAR TET SXT (n = 2) |
| 8 | 1.5 (2) | CFZ VEC DOX ENO GEN MAR TET SXT (n = 2) |
| 9 | 5.4 (7) | AMC CFZ VEC DOX ENO GEN MAR TET SXT (n = 4) |
| 10 | 3.1 (4) | AMC CFZ VEC CHL DOX ENO MAR PTZ TET SXT (n = 2) |
| 11 | 2.3(3) | AMK CFZ VEC FOX CHL DOX ENO GEN MAR TET SXT (n = 2) |
| 12 | 3.8 (5) | AMK CFZ VEC FOX CHL DOX ENO GEN MAR PTZ TET SXT (n = 2) |
| 13 | 1.5 (2) | AMK AMC CFZ VEC FOX CHL DOX ENO GEN MAR PTZ TET SXT (n = 2) |
| MDR | 33.1 (43) | – |

AMC, amoxicillin/clavulanic acid; AMK, amikacin; CFZ, cefazolin; CHL, chloramphenicol; DOX, doxycycline; ENO, enrofloxacin; FOX, cefoxitin; GEN, gentamicin; MAR, marbofloxacin; PTZ, piperacillin/tazobactam; SXT, trimethoprim/sulfamethoxazole; TET, tetracycline; VEC, cefovecin; MDR, multidrug resistance.
