# Supplementary material for: Antimicrobial resistance profiles and molecular characterization of extended- spectrum β-lactamase/AmpC-harboring Klebsiella pneumoniae isolated from clinically ill dogs and cats in South Korea
Source: Research Square preprint supplement (doi:10.21203/rs.3.rs-7006419/v1), 2025-07-09
Supplement: Supplementary file 2 [file 5e0fb235c8e8639f1e7b65f9.docx]

Table 4. Antimicrobial resistance pattern in *Klebsiella pneumoniae* isolatesobtained from diseased cats (n = 30) during 2018–2021 in South Korea

| No. of antimicrobials | % (No. of resistant isolates) | Most common resistance pattern (No. of isolates) |
| --- | --- | --- |
| 0 | 30.0 (9) | – |
| 1 | 13.3 (4) | FOX (n = 2) |
| 2 | 10.0 (3) | DOX TET (n = 1) |
| AMC FOX (n = 1) |
| CHL DOX (n = 1) |
| 3 | 3.3 (1) | CHL DOX TET (n = 1) |
| 6 | 3.3 (1) | AMC CFZ VEC FOX ENO PTZ (n = 1) |
| 8 | 10.0 (3) | AMC CFZ VEC FOX DOX ENO MAR TET (n = 1) |
| AMC CFZ VEC ENO GEN MAR PTZ SXT (n = 1) |
| AMC CFZ VEC CHL ENO GEN MAR SXT (n = 1) |
| 9 | 6.7 (2) | AMC CFZ CHL DOX ENO GEN MAR TET SXT (n = 1) |
| AMC CFZ VEC FOX ENO GEN MAR PTZ SXT (n = 1) |
| 10 | 6.7 (2) | AMK CFZ VEC FOX DOX ENO GEN MAR TET SXT (n = 1) |
| AMC CFZ VEC CHL DOX ENO GEN MAR TET SXT (n =1) |
| 11 | 3.3 (1) | CFZ VEC FOX CHL DOX ENO GEN MAR PTZ TET SXT (n = 1) |
| 12 | 10.0 (3) | AMK AMC CFZ VEC FOX DOX ENO GEN MAR PTZ TET SXT (n = 1) |
| AMK AMC CFZ VEC CHL DOX ENO GEN MAR PTZ TET SXT (n = 1) |
| AMC CFZ VEC FOX CHL DOX ENO GEN MAR PTZ TET SXT (n = 1) |
| 13 | 3.3 (1) | AMK AMC CFZ VEC FOX CHL DOX ENO GEN MAR PTZ TET SXT (n = 1) |
| MDR | 43.3 (13) | **–** |

AMC, amoxicillin/clavulanic acid; AMK, amikacin; CFZ, cefazolin; CHL, chloramphenicol; DOX, doxycycline; ENO, enrofloxacin; FOX, cefoxitin; GEN, gentamicin; MAR, marbofloxacin; PTZ, piperacillin/tazobactam; SXT, trimethoprim/sulfamethoxazole; TET, tetracycline; VEC, cefovecin; MDR, multidrug resistance.
