# Supplementary material for: Antimicrobial resistance profiles and molecular characterization of extended- spectrum β-lactamase/AmpC-harboring Klebsiella pneumoniae isolated from clinically ill dogs and cats in South Korea
Source: Research Square preprint supplement (doi:10.21203/rs.3.rs-7006419/v1), 2025-07-09
Supplement: Supplementary file 3 [file 6590b64ccbb9a27e4589c017.docx]

Supplementary Table 2. Number of recovered *Klebsiella pneumoniae* isolates from five targeted samples of different age groups of cats

| Sampling site | No. of isolates (%) | | | | | | Total |
| --- | --- | --- | --- | --- | --- | --- | --- |
| <1 year | 1–5 years | 6–10 years | 11–15 years | >15 years | Unknown |
| Diarrhea | 3 (21.4) | 4 (28.6) | 1 (7.1) | 1 (7.1) | 0 (0) | 5 (35.7) | 14 (46.7) |
| Skin | 1 (33.3) | 0 (0) | 1 (33.3) | 0 (0) | 0 (0) | 1 (33.3) | 3 (10) |
| Urine | 0 (0) | 3 (50) | 3 (50) | 0 (0) | 0 (0) | 0 (0) | 6 (20) |
| Respiratory | 3 (75) | 0 (0) | 0 (0) | 1 (25) | 0 (0) | 0 (0) | 4 (13.3) |
| Reproductive | 1 (33.3) | 1 (33.3) | 0 (0) | 1 (33.3) | 0 (0) | 0 (0) | 3 (10) |
| Total | 8 (26.7) | 8 (26.7) | 5 (16.7) | 3 (10) | 0 (0) | 6 (20) | 30 (100) |
