# Supplementary material for: Antimicrobial resistance profiles and molecular characterization of extended- spectrum β-lactamase/AmpC-harboring Klebsiella pneumoniae isolated from clinically ill dogs and cats in South Korea
Source: Research Square preprint supplement (doi:10.21203/rs.3.rs-7006419/v1), 2025-07-09
Supplement: Supplementary file 4 [file 6a9be57b31b7fe69e28f925d.docx]

Table 5. Characterization of ESBL/AmpC-carrying *Klebsiella pneumoniae* isolates obtained from diseased dogs and cats during 2018–2021 in South Korea

| Isolates | Animals | Sample | Age  (year) | Province | Animal  ID | Hospital  ID | Year | MIC (µg/mL) | | Non-β-lactam resistance | ESBL/  AmpC gene | Virulence factor | ST | PFGE |
| --- | --- | --- | --- | --- | --- | --- | --- | --- | --- | --- | --- | --- | --- | --- |
| CTX | FOX |
| P11-017-002 | Dog | Respiratory | <1 | Seoul | A | B | 2018 | 4 | >128 | CHL DOX ENO MAR TET SXT | *bla*DHA-1 | – | 709 | P3 |
| D11-030-002 | Dog | Skin | <1 | Incheon | B | H | 2018 | >16 | ≤8 | DOX ENO GEN MAR TET SXT | *bla*CTX-M-15 | – | 307 | P16 |
| E11-030-001 | Dog | Digestive | 6–10 | Incheon | C | A | 2018 | >16 | >128 | AMK CHL DOX ENO GEN MAR PTZ TET SXT | *bla*CTX-M-27  *bla*DHA-1 | – | 37 | P28 |
| G11-030-003 | Dog | Reproductive | 1–5 | Daejeon | F | T | 2018 | >16 | 16 | CHL DOX ENO GEN MAR PTZ TET SXT | *bla*CTX-M-15 | *irp2* | 307 | P18 |
| D11-025-005 | Dog | Skin | 16–20 | Seoul | G | D | 2019 | >16 | 64 | CHL DOX ENO GEN MAR PTZ TET SXT | *bla*CTX-M-15 *bla*SHV-28 | *irp2* | 307 | P17 |
| G11-030-001 | Dog | Reproductive | 11–15 | Daegu | H | V | 2019 | >16 | >128 | AMK CHL DOX ENO GEN MAR TET SXT | *bla*CTX-M-65 *bla*DHA-1 | – | 1128 | P10 |
| A11-030-001 | Dog | Digestive | Unknown | Incheon | I | F | 2019 | 2 | 128 | AMK CHL DOX ENO GEN MAR TET SXT | *bla*DHA-1 | *terB* | 1121 | P29 |
| E11-030-001 | Dog | Digestive | Unknown | Incheon | J | A | 2019 | 2 | >128 | AMK CHL DOX ENO GEN TET SXT | *bla*DHA-1 | *terB* | 359 | P5 |
| E11-030-002 | Dog | Digestive | 11–15 | Incheon | K | A | 2019 | >16 | >128 | AMK CHL DOX ENO GEN MAR TET SXT | *bla*CTX-M-27  *bla*DHA-1 | – | 37 | P22 |
| E11-032-019 | Dog | Digestive | <1 | Daejeon | L | R | 2019 | 8 | 64 | – | *bla*CMY-2 | – | 35 | P25 |
| H12-E1-7 | Dog | Digestive | <1 | Seoul | AA | J | 2019 | >16 | ≤8 | AMK CHL DOX ENO GEN MAR TET SXT | *bla*CTX-M-55 | – | 8213 | P8 |
| H15-D2-4 | Dog | Skin | 14 | Seoul | AB | I | 2019 | >16 | 16 | CHL DOX ENO MAR PTZ TET SXT | *bla*CTX-M-15 | *irp2* | 307 | P11 |
| H9-E2-7 | Dog | Digestive | 14 | Seoul | AC | G | 2019 | >16 | 16 | DOX ENO GEN MAR TET SXT | *bla*CTX-M-15 | – | 392 | P2 |
| H8-E6-9 | Dog | Digestive | 9 | Seoul | AE | C | 2019 | >16 | ≤8 | DOX ENO GEN MAR TET SXT | *bla*CTX-M-15 | – | 307 | P15 |
| H1-E89-7 | Dog | Digestive | 8 | Seoul | AF | E | 2019 | >16 | >128 | PTZ | *bla*CMY-2 | – | 8215 | P9 |
| H15-U3-1 | Dog | Reproductive | 6 | Seoul | AG | I | 2019 | >16 | 16 | CHL DOX ENO MAR PTZ TET SXT | *bla*CTX-M-15 | *irp2* | 3368 | P11 |
| H9-E18-9 | Dog | Digestive | <1 | Seoul | AH | G | 2019 | >16 | ≤8 | ENO TET | *bla*CTX-M-15 | – | 307 | P14 |
| H2-D28-3 | Dog | Skin | 7 | Seoul | AI | N | 2019 | 16 | >128 | AMK DOX ENO GEN MAR PTZ TET SXT | *bla*DHA-1 | *terB* | 392 | P6 |
| P11-030-001 | Dog | Respiratory | ≤1 | Seoul | N | M | 2020 | >16 | ≤8 | CHL ENO MAR TET SXT | *bla*CTX-M-15 *bla*CTX-M-65 | – | 15 | P27 |
| P11-030-002 | Dog | Respiratory | ≤1 | Incheon | O | M | 2020 | >16 | ≤8 | CHL ENO MAR TET SXT | *bla*CTX-M-15 *bla*CTX-M-65 | – | 15 | P26 |
| P11-030-003 | Dog | Respiratory | ≤1 | Seoul | P | M | 2020 | >16 | >128 | AMK CHL DOX ENO GEN MAR PTZ TET SXT | *bla*CTX-M-15 *bla*CTX-M-65 *bla*DHA-1 | *terB* | 15 | P26 |
| P11-030-004 | Dog | Respiratory | ≤1 | Seoul | Q | M | 2020 | >16 | ≤8 | CHL DOX ENO GEN MAR TET SXT | *bla*CTX-M-15 *bla*CTX-M-65 | – | 15 | P27 |
| P11-030-008 | Dog | Respiratory | ≤1 | Seoul | R | M | 2020 | >16 | >128 | AMK CHL DOX ENO GEN MAR PTZ TET SXT | *bla*CTX-M-15 *bla*DHA-1 | *terB* | 15 | P26 |
| P11-030-011 | Dog | Respiratory | ≤1 | Seoul | S | M | 2020 | >16 | >128 | AMK CHL DOX ENO GEN MAR PTZ TET SXT | *bla*CTX-M-3 *bla*NDM-5 *bla*SHV-27 | – | 967 | P31 |
| P11-030-001 | Dog | Respiratory | 7 | Daegu | T | Q | 2020 | >16 | 16 | DOX ENO GEN MAR TET SXT | *bla*CTX-M-15 | *terB* | 392 | P1 |
| D11-030-001 | Dog | Skin | 4 | Ulsan | V | O | 2020 | 4 | 32 | DOX ENO TET | *bla*CTX-M-15 | *irp2* | 307 | P12 |
| H4-E14-8 | Dog | Digestive | 6 | Seoul | AJ | S | 2020 | >16 | ≤8 | SXT | *bla*CTX-M-15 | – | 8216 | P4 |
| P11-030-001 | Dog | Respiratory | 10 | Gwangju | X | P | 2021 | >16 | ≤8 | DOX TET SXT | *bla*CTX-M-15 | *irp2* | 792 | P7 |
| P11-030-001 | Dog | Respiratory | Unknown | Gyeonggi | AM | W | 2022 | >16 | ≤8 | AMK CHL DOX GEN TET SXT | *bla*CTX-M-55 | – | 1530 | P30 |
| P11-030-002 | Dog | Respiratory | Unknown | Gyeonggi | AN | W | 2022 | >16 | ≤8 | AMK CHL DOX GEN TET SXT | *bla*CTX-M-55 | - | 1530 | P30 |
| E12-030-001 | Cat | Digestive | Unknown | Incheon | D | A | 2018 | >16 | >128 | AMK DOX ENO GEN MAR PTZ TET SXT | *bla*CMY-2 | *terB* | 15 | P23 |
| E12-030-002 | Cat | Digestive | Unknown | Incheon | E | A | 2018 | >16 | >128 | AMK CHL DOX ENO GEN MAR PTZ TET SXT | *bla*CTX-M-27  *bla*DHA-1 | – | 37 | P28 |
| H14-U5C-1 | Cat | Urine | 10 | Seoul | Y | K | 2018 | >16 | >128 | ENO GEN MAR PTZ SXT | *bla*CTX-M-15 *bla*CMY-2 | – | 307 | P13 |
| U12-030-001 | Cat | Urine | 6–10 | Ulsan | M | O | 2019 | >16 | >128 | CHL DOX ENO GEN MAR PTZ TET SXT | *bla*DHA-1 | *iucA* | 709 | P24 |
| H9-E5C-7 | Cat | Digestive | 2 | Seoul | AD | G | 2019 | 16 | 128 | DOX ENO MAR TET | *bla*CMY-2 | *terB* | 8214 | P20 |
| P12-030-001 | Cat | Respiratory | <1 | Daegu | U | U | 2020 | >16 | >128 | AMK DOX ENO GEN MAR TET SXT | *bla*CTX-M-15 *bla*DHA-1 | *irp2, terB* | 15 | P23 |
| U12-030-001 | Cat | Urine | 7 | Ulsan | W | O | 2020 | >16 | >128 | CHL DOX ENO GEN MAR PTZ TET SXT | *bla*DHA-1 | – | 709 | P24 |
| H3-U295C-3 | Cat | Urine | 5 | Seoul | AK | L | 2020 | >16 | ≤8 | ENO GEN MAR PTZ SXT | *bla*CTX-M-15 | – | 8217 | P14 |
| H3-U307C-1 | Cat | Urine | 1 | Seoul | AL | L | 2020 | >16 | ≤8 | CHL ENO GEN MAR SXT | *bla*CTX-M-15 | – | 307 | P14 |
| 23D81 | Cat | Feces | 8 | Daejeon | AO | X | 2023 | >16 | 16 | CHL DOX ENO GEN MAR TET SXT | *bla*CTX-M-27 | – | 395 | P21 |

AMK, amikacin; CHL, chloramphenicol; CTX, cefotaxime; DOX, doxycycline; ENO, enrofloxacin; GEN, gentamicin; MAR, marbofloxacin; PTZ, piperacillin/tazobactam; SXT, trimethoprim/sulfamethoxazole; TET, tetracycline. MIC, minimum inhibitory concentration; ESBL/AmpC, extended-spectrum β-lactamase/AmpC β-lactamase; ST, sequence type. PFGE, pulsed-field gel electrophoresis.
