# Supplementary material for: Antimicrobial resistance profiles and molecular characterization of extended- spectrum β-lactamase/AmpC-harboring Klebsiella pneumoniae isolated from clinically ill dogs and cats in South Korea
Source: Research Square preprint supplement (doi:10.21203/rs.3.rs-7006419/v1), 2025-07-09
Supplement: Supplementary file 5 [file 929a0ddcf8a0c9368ff6d10a.docx]

Supplementary Table 3. List of primer sequences and polymerase chain reaction (PCR) conditions

| Primer | Sequence (5'-3') | | Amplicon Size (bp) | PCR condition | References |
| --- | --- | --- | --- | --- | --- |
| CTX-M-Universala | F-ATGTGCAGYACCAGTAARGTKATGGC | | 593 | 35 cycles; 95℃ 1min + 60℃ 1min + 72℃ 1min | [1] |
| R-TGGGTRAARTARGTSACCAGAAYCAGCGG | |
| CTX-M-1 familiesa | F-AAGACTGGGTGTGGCATTGA | 670 | | 35 cycles; 95℃ 1min + 60℃ 1min + 72℃ 1min | [2] |
| R-AGGCTGGGTGAAGTAAGTGA |
| CTX-M-2 familiesa | F-CTGGAAGCCCTGGAGAAAAG | 789 | | 35 cycles; 95℃ 1min + 60℃ 1min + 72℃ 1min | [2] |
| R-TACCTCGCTCCATTTATTGC |
| CTX-M-8 familiesa | F-GCCTGTATTTCGCTGTTG | 686 | | 35 cycles; 95℃ 1min + 60℃ 1min + 72℃ 1min | [2] |
| R-TGTCATTCGTCGTACCATAA |
| CTX-M-9 familiesa | F-GCTTTATGCGCAGACGAGTG | 703 | | 35 cycles; 95℃ 1min + 60℃ 1min + 72℃ 1min | [2] |
| R-GCCAGATCACCGCAATATCA |
| *MOX-1, MOX-2 CMY-1, CMY-8*  to *CMY-11 b* | F-GCTGCTCAAGGAGCACAGGAT | 520 | | 25 cycles; 94℃ 30 sec + 64℃ 30 sec + 72℃ 1min | [3] |
| R-CACATTGACATAGGTGTGGTGC |
| *LAT-1* to *LAT-4, CMY-2* to *CMY-7, BIL-1b* | F-TGGCCAGAACTGACAGGCAAA | 462 | | 25 cycles; 94℃ 30 sec + 64℃ 30 sec + 72℃ 1min | [3] |
| R-TTTCTCCTGAACGTGGCTGGC |
| *DHA-1, DHA-2b* | F-AACTTTCACAGGTGTGCTGGGT | 405 | | 25 cycles; 94℃ 30 sec + 64℃ 30 sec + 72℃ 1min | [3] |
| R-CCGTACGCATACTGGCTTTGC |
| *ACCb* | F-AACAGCCTCAGCAGCCGGTTA | 346 | | 25 cycles; 94℃ 30 sec + 64℃ 30 sec + 72℃ 1min | [3] |
| R-TTCGCCGCAATCATCCCTAGC |
| *MIR1T, ACT-1b* | F-TCGGTAAAGCCGATGTTGCGG | 302 | | 25 cycles; 94℃ 30 sec + 64℃ 30 sec + 72℃ 1min | [3] |
| R-CTTCCACTGCGGCTGCCAGTT |
| *FOX-1* to *FOX-5b* | F-AACATGGGGTATCAGGGAGATG | 190 | | 25 cycles; 94℃ 30 sec + 64℃ 30 sec + 72℃ 1min | [3] |
| R-CAAAGCGCGTAACCGCATTGG |
| *TEM* | F-CGCCGCATACACTATTCTCAGAATGA | 445 | | 34 cycles; 94℃ 30 sec + 50℃ 30 sec + 72℃ 1min | [1] |
| R-ACGCTCACCGGCTCCAGATTTAT |
| *SHV* | F-ATGCGTTATATTCGCCTGTG | 747 | | 34 cycles; 94℃ 30 sec + 50℃ 30 sec + 72℃ 1min | [1] |
| R-TGCTTTGTTATTCGGGCCAA |
| *iucAc* | F-AATCAATGGCTATTCCCGCTG | 239 | | 25 cycles; 95℃ 30sec + 59℃ 30sec + 72℃ 1min | [4] |
| R-CGCTTCACTTCTTTCACTGACAGG |
| *irp2 c* | F-GCTACAATGGGACAGCAACGAC | 230 | | 25 cycles; 95℃ 30sec + 59℃ 30sec + 72℃ 1min | [5] |
| R-GCAGAGCGATACGGAAAATGC |
| *terB c* | F-TATCGCTGTTGCCAGTGAC | 288 | | 25 cycles; 95℃ 30sec + 59℃ 30sec + 72℃ 1min | [5] |
| R-CGGACAGCACTCTTCTCATC |

a Primer sequences used in *bla*CTX-M,

b Primer sequences used in *bla*CMY

c Primer sequences used in determinantion of virulence gene

**References**

1. Monstein H, Östholm‐Balkhed Å, Nilsson M V, Nilsson M, Dornbusch K, Nilsson LE. Multiplex PCR amplification assay for the detection of *bla*SHV, *bla*TEM and *bla*CTX‐M genes in *Enterobacteriaceae*. Apmis. 2007;115:1400–8. https://doi.org/10.1111/j.1600-0463.2007.00722.x

2. Johansson V, Nykäsenoja S, Myllyniemi A-L, Rossow H, Heikinheimo A. Genomic characterization of ESBL/AmpC-producing and high-risk clonal lineages of *Escherichia coli* and *Klebsiella pneumoniae* in imported dogs with shelter and stray background. J Glob Antimicrob Resist. 2022;30:183–90. https://doi.org/10.1016/j.jgar.2022.05.021

3. Pérez-Pérez FJ, Hanson ND. Detection of plasmid-mediated AmpC β-lactamase genes in clinical isolates by using multiplex PCR. J Clin Microbiol. 2002;40:2153–62. https://doi.org/10.1128/jcm.40.6.2153-2162.2002

4. Mario E, Hamza D, Abdel-Moein K. Hypervirulent *Klebsiella pneumonia*e among diarrheic farm animals: a serious public health concern. Comp Immunol Microbiol Infect Dis. 2023;102:102077. https://doi.org/10.1016/j.cimid.2023.102077.

5. A. RT, Ruth O, Ulrike M, Daniel M, M. ML, J. DE, et al. Aerobactin mediates virulence and accounts for increased siderophore production under iron-limiting conditions by hypervirulent (Hypermucoviscous) *Klebsiella pneumoniae*. Infect Immun. 2014;82:2356–67. https://doi.org/10.1128/iai.01667-13
