# Supplementary material for: Antimicrobial resistance profiles and molecular characterization of extended- spectrum β-lactamase/AmpC-harboring Klebsiella pneumoniae isolated from clinically ill dogs and cats in South Korea
Source: Research Square preprint supplement (doi:10.21203/rs.3.rs-7006419/v1), 2025-07-09
Supplement: Supplementary file 6 [file 97c87e7181de8a16f045252f.docx]

Table 1. *Klebsiella pneumoniae* isolatesobtained from diseased dogs and cats during 2018–2021 in South Korea

| Year | Dogs | | | | | | | Cats | | | | | | |  | |
| --- | --- | --- | --- | --- | --- | --- | --- | --- | --- | --- | --- | --- | --- | --- | --- | --- |
| No. of Hospital | Digestive disease | Respiratory disease | Reproductive disease | Skin/ear | Urine | Subtotal | No. of Hospital | Digestive disease | Urine | Respiratory disease | Reproductive disease | Skin/ear | Subtotal | Total |
| 2018 | 14 | 15 | 3 | 5 | 4 | 0 | 27 | 3 | 4 | 1 | 0 | 0 | 0 | 5 | 32 |
| 2019 | 28 | 41 | 1 | 5 | 7 | 1 | 55 | 6 | 5 | 1 | 1 | 1 | 1 | 9 | 64 |
| 2020 | 16 | 23 | 10 | 6 | 4 | 1 | 44 | 9 | 4 | 4 | 3 | 2 | 2 | 15 | 59 |
| 2021 | 1 | 0 | 1 | 0 | 0 | 0 | 1 | 0 | 0 | 0 | 0 | 0 | 0 | 0 | 1 |
| 2022 | 1 | 0 | 2 | 0 | 0 | 0 | 2 | 0 | 0 | 0 | 0 | 0 | 0 | 0 | 2 |
| 2023 | 1 | 0 | 1 | 0 | 0 | 0 | 1 | 1 | 1 | 0 | 0 | 0 | 0 | 1 | 2 |
| Total | 44* | 79 | 18 | 16 | 15 | 2 | 130 | 16* | 14 | 6 | 4 | 3 | 3 | 30 | 160 |

* Duplicate hospitals were counted once
