# Supplementary material for: Antimicrobial resistance profiles and molecular characterization of extended- spectrum β-lactamase/AmpC-harboring Klebsiella pneumoniae isolated from clinically ill dogs and cats in South Korea
Source: Research Square preprint supplement (doi:10.21203/rs.3.rs-7006419/v1), 2025-07-09
Supplement: Supplementary file 7 [file bb968ea8ba79faf7f1c4f461.docx]

Supplementary Table 1. Number of recovered *Klebsiella pneumoniae* isolates from five targeted samples of different age groups of dogs

| Sampling site | No. of isolates (%) | | | | | | Total |
| --- | --- | --- | --- | --- | --- | --- | --- |
| <1 year | 1–5 years | 6–10 years | 11–15 years | >15 years | Unknown |
| Diarrhea | 10 (12.7) | 30 (38) | 19 (24.1) | 12 (15.2) | 2 (2.5) | 6 (7.6) | 79 (60.8) |
| Skin | 1 (6.7) | 4 (26.7) | 4 (26.7) | 4 (26.7) | 1 (6.7) | 1 (6.7) | 15 (11.5) |
| Urine | 0 (0) | 1 (50) | 0 (0) | 1 (50) | 0 (0) | 0 (0) | 2 (1.5) |
| Respiratory | 2 (11.1) | 8 (44.4) | 2 (11.1) | 3 (16.7) | 1 (5.6) | 2 (11.1) | 18 (13.8) |
| Reproductive | 0 (0) | 5 (31.3) | 6 (37.5) | 5 (31.3) | 0 (0) | 0 (0) | 16 (12.3) |
| Total | 13 (10) | 48 (36.9) | 31 (23.8) | 25 (19.2) | 4 (3.1) | 9 (6.9) | 130 (100) |
