# Supplementary material for: Antimicrobial resistance profiles and molecular characterization of extended- spectrum β-lactamase/AmpC-harboring Klebsiella pneumoniae isolated from clinically ill dogs and cats in South Korea
Source: Research Square preprint supplement (doi:10.21203/rs.3.rs-7006419/v1), 2025-07-09
Supplement: Supplementary file 8 [file e1260bd06606a06c6a043438.docx]

Table 2. Antimicrobial resistance in *Klebsiella pneumoniae* isolatesobtained from diseased dogs and cats during 2018–2021 in South Korea

| Antimicrobials agents | Break-  points  (µg/mL) | Dogs (n = 130) | | | | | | | Cats (n = 30) | | | | | | |
| --- | --- | --- | --- | --- | --- | --- | --- | --- | --- | --- | --- | --- | --- | --- | --- |
| Digestive (n = 79) | | | Other samples (n = 51) | | | *p*-value | Digestive (n = 14) | | | Other samples (n = 16) | | | *p*-value |
| MIC50 | MIC90 | % Resist. (n) | MIC50 | MIC90 | % Resist. (n) | MIC50 | MIC90 | % Resist. (n) | MIC50 | MIC90 | % Resist. (n) |
| Aminoglycosides |  |  |  |  |  |  |  |  |  |  |  |  |  |  |  |
| Amikacin | ≥64 | 4 | 4 | 6.3 (5) | 4 | 64 | 13.7 (7) | 0.15 | 4 | 4 | 14.3 (2) | 4 | 4 | 12.5 (2) | 0.88 |
| Gentamicin | ≥8 | 0.25 | 0.5 | 8.9 (7) | 0.25 | 16 | 27.5 (14) | <0.01 | 0.25 | 0.5 | 21.4 (3) | 0.25 | 16 | 50.0 (8) | 0.1 |
| β-lactam/β-lactamase inhibitors |  |  |  |  |  |  |  |  |  |  |  |  |  |  |  |
| Amoxicillin/clavulanic acid | ≥32 | 8 | 8 | 3.8 (3) | 8 | 128 | 25.5 (13) | <0.01 | 8 | 128 | 35.7 (5) | 8 | 128 | 43.8 (7) | 0.65 |
| Piperacillin/tazobactam | ≥32 | 8 | 8 | 2.5 (2) | 8 | 32 | 17.6 (9) | <0.01 | 8 | 64 | 21.4 (3) | 8 | 64 | 31.3 (5) | 0.54 |
| Cephalosporin I |  |  |  |  |  |  |  |  |  |  |  |  |  |  |  |
| Cefazolin | ≥32 | 2 | 64 | 16.5 (13) | 2 | 64 | 41.2 (21) | <0.01 | 4 | 64 | 42.9 (6) | 2 | 64 | 50.0 (8) | 0.7 |
| Cephalosporin Ⅲ |  |  |  |  |  |  |  |  |  |  |  |  |  |  |  |
| Cefovecin | ≥8 | 1 | 16 | 12.7 (10) | 2 | 16 | 41.2 (21) | <0.01 | 1 | 16 | 35.7 (5) | 2 | 16 | 43.8 (7) | 0.65 |
| Cephamycin |  |  |  |  |  |  |  |  |  |  |  |  |  |  |  |
| Cefoxitin | ≥32 | 16 | 16 | 11.4 (9) | 16 | 128 | 21.6 (11) | 0.11 | 16 | 256 | 35.7 (5) | 16 | 256 | 37.5 (6) | 0.91 |
| Fluoroquinolones |  |  |  |  |  |  |  |  |  |  |  |  |  |  |  |
| Enrofloxacin | ≥4 | 0.12 | 2 | 10.1 (8) | 1 | 8 | 43.1 (22) | <0.01 | 0.12 | 8 | 35.7 (5) | 1 | 8 | 50.0 (8) | 0.43 |
| Marbofloxacin | ≥4 | 0.12 | 1 | 7.6 (6) | 0.25 | 8 | 35.3 (18) | <0.01 | 0.12 | 4 | 28.6 (4) | 1 | 8 | 50.0 (8) | 0.23 |
| Phenicols |  |  |  |  |  |  |  |  |  |  |  |  |  |  |  |
| Chloramphenicol | ≥32 | 8 | 64 | 13.9 (11) | 8 | 64 | 39.2 (20) | <0.01 | 8 | 64 | 28.6 (4) | 8 | 64 | 31.3 (5) | 0.87 |
| Tetracyclines |  |  |  |  |  |  |  |  |  |  |  |  |  |  |  |
| Doxycycline | ≥16 | 2 | 16 | 19.0 (15) | 8 | 16 | 51.0 (26) | <0.01 | 2 | 16 | 42.9 (6) | 4 | 16 | 37.5 (6) | 0.76 |
| Tetracycline | ≥16 | 4 | 32 | 24.1 (19) | 16 | 32 | 56.9 (29) | <0.01 | 4 | 32 | 42.9 (6) | 4 | 32 | 37.5 (6) | 0.91 |
| Folate pathway inhibitors |  |  |  |  |  |  |  |  |  |  |  |  |  |  |  |
| Trimethoprim/sulfamethoxazole | ≥4 | 0.5 | 8 | 21.5 (17) | 0.5 | 8 | 43.1 (22) | <0.01 | 0.5 | 1 | 21.4 (3) | 8 | 8 | 56.3 (9) | 0.05 |
| MDR |  |  |  | 25.3 (20) |  |  | 52.9 (27) | <0.01 |  |  | 42.9 (6) |  |  | 50.0 (8) | 0.69 |

Minimum inhibition concentration (MIC). MIC50 and MIC90 are the concentrations (µg/mL) of antimicrobials at which 50% and 90% of the isolates were inhibited, respectively. MDR, multidrug resistance. *p* <0.05indicates a statistically significant change in antimicrobial resistance rate.
